# Supplementary material for: GRACE water storage estimates for the Middle East and other regions with significant reservoir and lake storage
Source: Copernicus journal article supplement (doi:10.5194/hess-17-4817-2013), 2013-12-05
Supplement: Supplementary file [file hess-17-4817-2013-supplement.pdf]

5

## Supplementary files for

10

# GRACE Water Storage Estimates for the Middle East and Other Regions with Significant Reservoir and Lake Storage

15

20

Submitted to HESS

In discussion in HESSD

25

30

Longuevergne L. <sup>1</sup>; Wilson, C.R. <sup>2</sup>; Scanlon, B.R. <sup>3</sup>; Cretaux, J.F. <sup>4</sup>

35

- (1) CNRS - Géosciences Rennes UMR 6118, Université de Rennes 1, Rennes, France
- (2) Department of Geological Sciences, Jackson School of Geosciences, The University of Texas at Austin, Austin, TX, USA
- (3) Bureau of Economic Geology, Jackson School of Geosciences, The University of Texas at Austin, Austin, TX, USA
- (4) CNES/LEGOS, 14, av. Édouard-Belin, 31400 Toulouse, France

40

|    |                                              |                                    |
|----|----------------------------------------------|------------------------------------|
| 1. | Numerical Experiment 1 .....                 | 2                                  |
| 2. | Numerical Experiment 2 .....                 | 4                                  |
| 3. | SH spectra for example regions.....          | <b>Erreur ! Signet non défini.</b> |
| 4. | Tigris-Euphrates Basin – LSM Estimates ..... | 7                                  |
| 5. | Lower Orinoco - Guri Dam .....               | 8                                  |
| 6. | East African Lakes .....                     | 11                                 |

45

# 1. Numerical Experiment 1

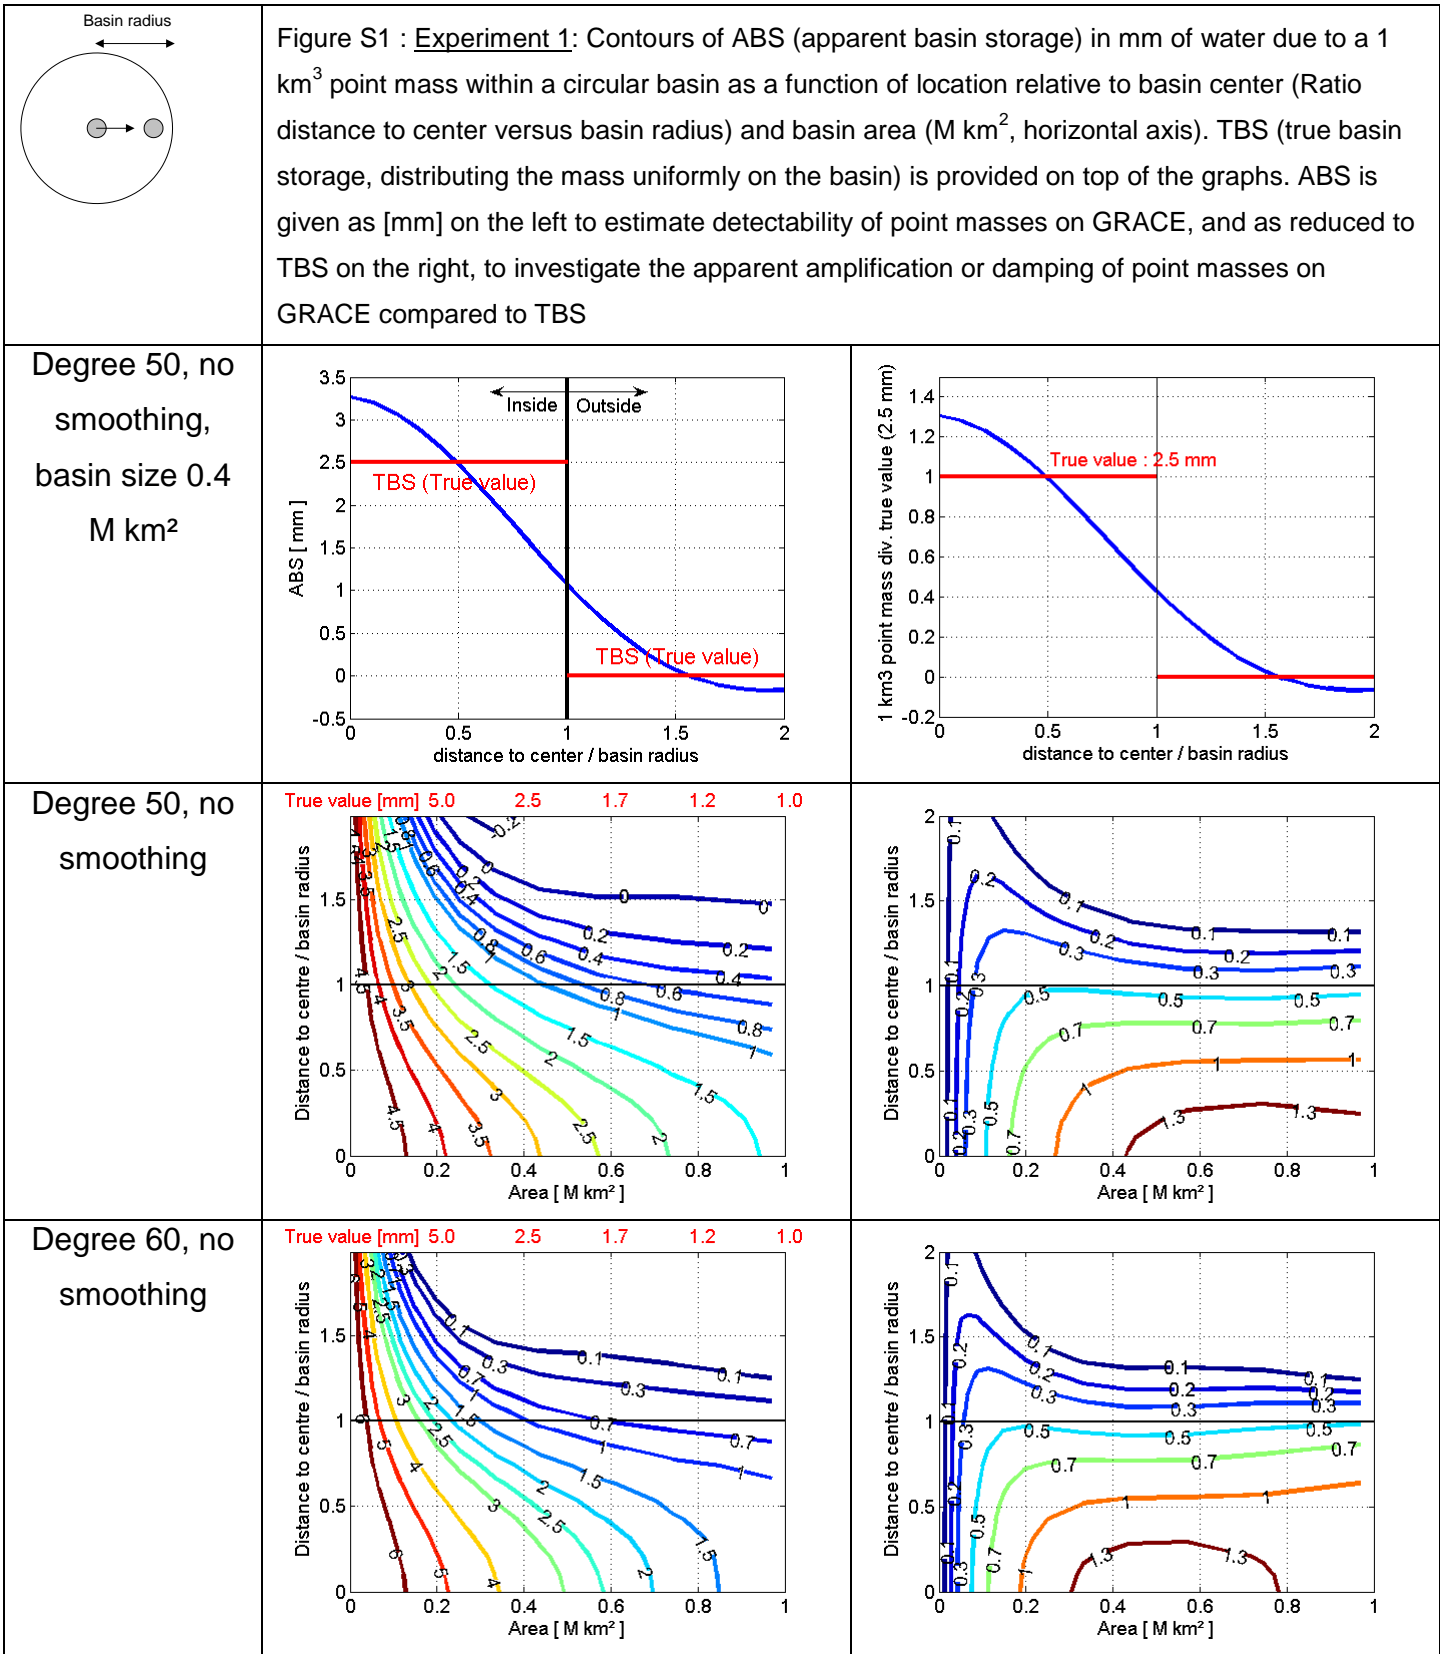

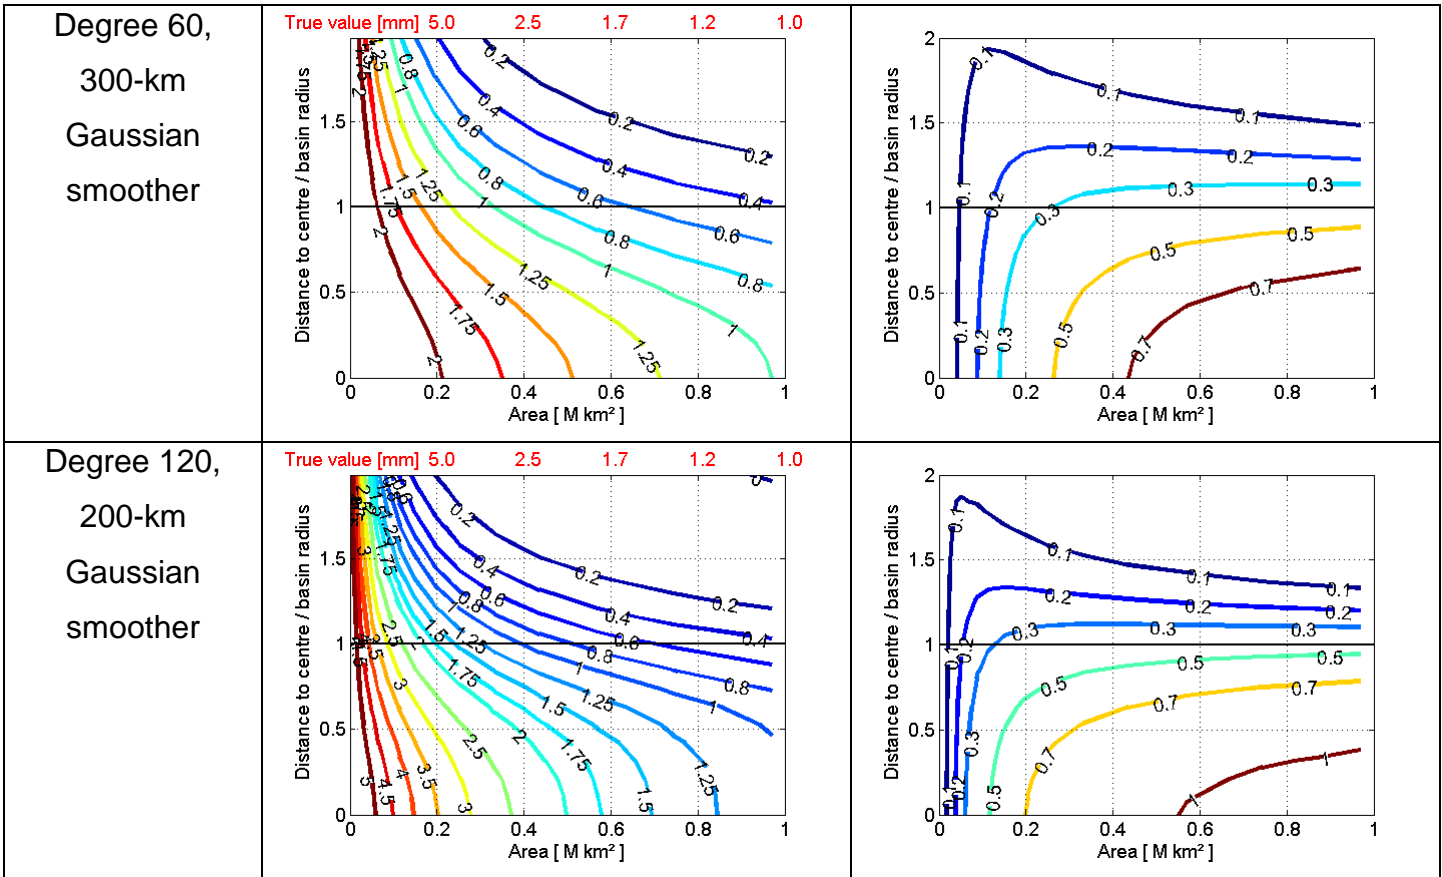

## 2. Numerical Experiment 2

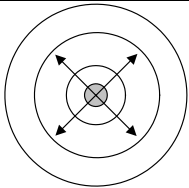

Figure S2: Experiment 2: Mass is focused at the basin center, but its size is varied symmetrically. Contours give ABS of the impact of a 1 km<sup>3</sup> mass uniformly distributed, in [mm] on the left, reduced to the impact on GRACE of the same mass distributed over the basin on the right. The upper axis includes the corresponding true basin storage (1 km<sup>3</sup> storage volume divided by corresponding basin area). T50G0 refers to truncation to degree 50 and zero Gaussian smoothing.

Degree 50, no smoothing, basin size 0.4 M km<sup>2</sup>

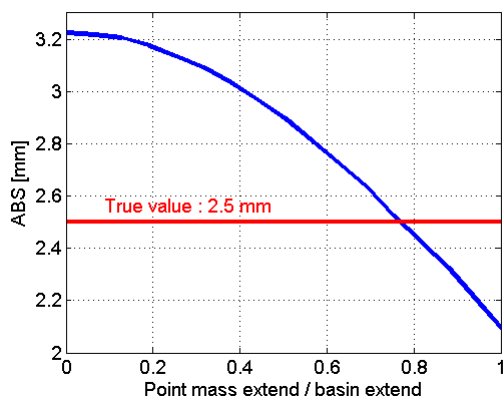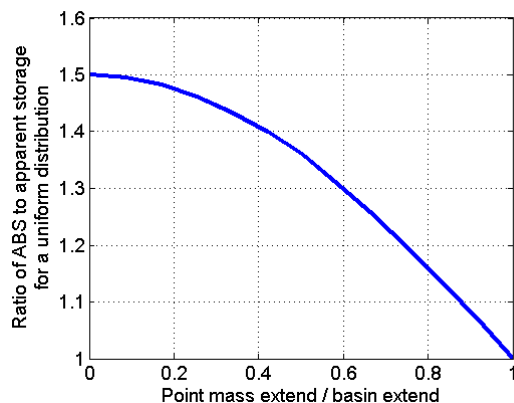

Degree 50, no smoothing

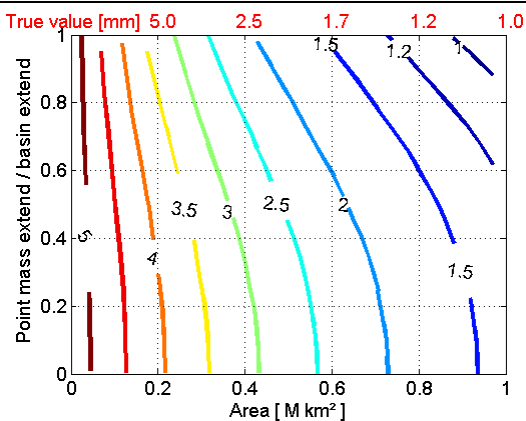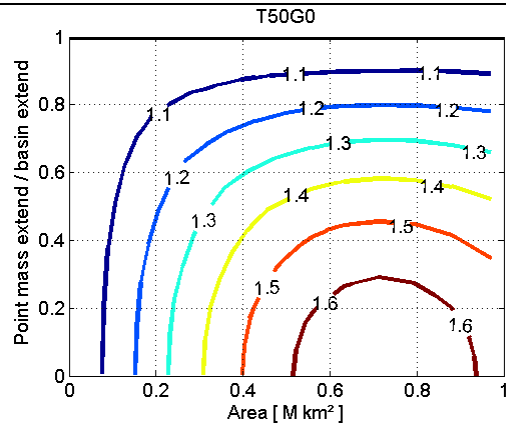

Degree 60, no smoothing

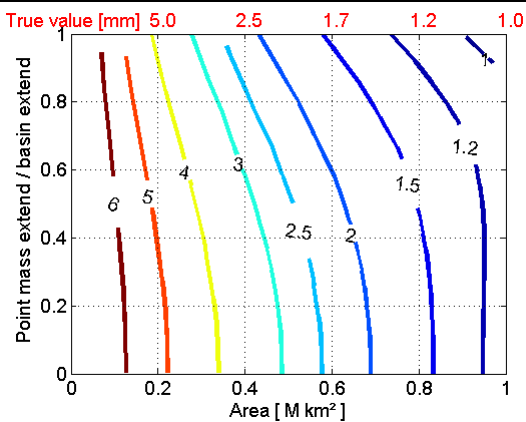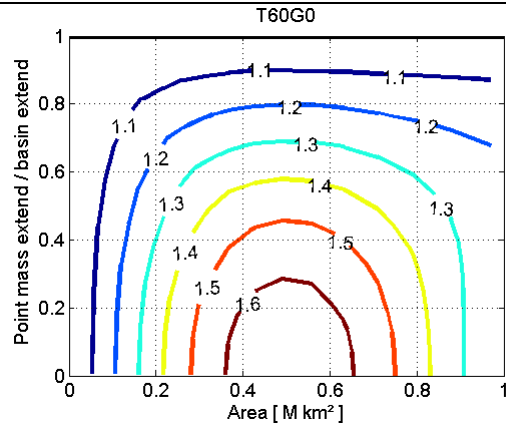

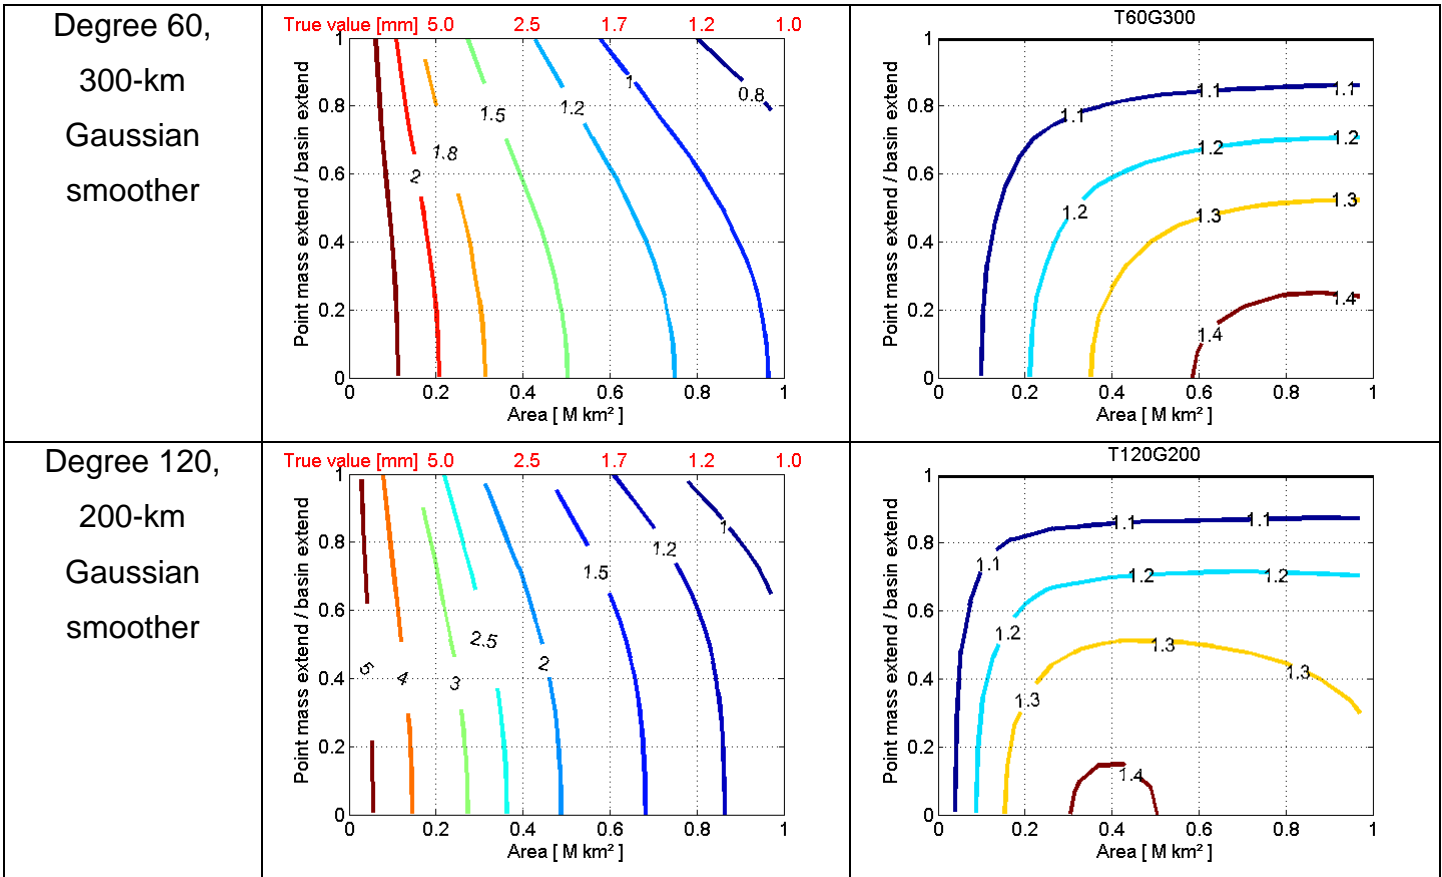

### 3. Table S1: Lake and Reservoir Data Summary.

| Region                                           | Lake name    | Area [ km <sup>2</sup> ]     | Variability [ km <sup>3</sup> ] | Volume / Level data |
|--------------------------------------------------|--------------|------------------------------|---------------------------------|---------------------|
| <b>Lower Nile (410 000 km<sup>2</sup>)</b>       | <b>Aswan</b> | <b>6200 km<sup>2</sup></b>   | <b>16 km<sup>3</sup></b>        | <b>Level</b>        |
| <b>Lower Orinoco (350 000 km<sup>2</sup>)</b>    | <b>Guri</b>  | <b>3919 km<sup>2</sup></b>   | <b>23 km<sup>3</sup></b>        |                     |
| <b>Tigris-Euphrates (790 000 km<sup>2</sup>)</b> | <b>TOTAL</b> | <b>15300 km<sup>2</sup></b>  | <b>24 km<sup>3</sup></b>        |                     |
|                                                  | Asad         | 447                          | 0.30                            | Level               |
|                                                  | Ataturk      | 707                          | 1.6                             | Level               |
|                                                  | Daryace      | 5200                         | 3.7                             | Volume              |
|                                                  | Mossoul      | 285                          | 1.8                             | Level               |
|                                                  | Qadisiyah    | 415                          | 3.3                             | Volume              |
|                                                  | Razazah      | 1501                         | 1.9                             | Level               |
|                                                  | Saksak       | 458                          | 1.7                             | Volume              |
|                                                  | Tharthar     | 2500                         | 8.3                             | Level               |
|                                                  | Van          | 3755                         | 1.0                             | Level               |
| <b>East Africa (1 125 000 km<sup>2</sup>)</b>    | <b>TOTAL</b> | <b>175144 km<sup>2</sup></b> | <b>86 km<sup>3</sup></b>        |                     |
|                                                  | Albert       | 5270                         | 2.9                             | Level               |
|                                                  | Bangwelu     | 9840                         | 3.9                             | Level               |
|                                                  | Cahora Bassa | 2739                         | 5.6                             | Level               |
|                                                  | Edouard      | 2150                         | 0.48                            | Volume              |
|                                                  | Kariba       | 5400                         | 10.6                            | Level               |
|                                                  | Kivu         | 2700                         | 0.63                            | Level               |
|                                                  | Kyoga        | 1720                         | 1.2                             | Level               |
|                                                  | Malawi       | 29500                        | 14                              | Level               |
|                                                  | Mweru        | 5120                         | 3.0                             | Level               |
|                                                  | Rukwa        | 2600                         | 2.3                             | Level               |
|                                                  | Tanganyka    | 32900                        | 12                              | Level               |
|                                                  | Turkana      | 6405                         | 4.6                             | Level               |
|                                                  | Victoria     | 68800                        | 25                              |                     |

#### 4. Tigris-Euphrates Basin – Land Surface Model (LSM) Estimates

65

Table S2: Comparison between GRACE TWS,  $\Delta$ SMS+ $\Delta$ SWES from CLM, NOAH, MOSAIC, and VIC LSMs and  $\Delta$ RESS for Tigris-Euphrates basin. In all cases, adding predicted  $\Delta$ RESS contribution to LSM output results in better agreement with GRACE data

|                                                  | GRACE<br>CSR | CLM   | CLM +<br>$\Delta$ RESS | MOSAIC | MOSAIC<br>+<br>$\Delta$ RESS | NOAH | NOAH<br>+<br>$\Delta$ RESS | VIC  | VIC +<br>$\Delta$ RESS | WGHM | WGHM<br>+<br>$\Delta$ RESS |
|--------------------------------------------------|--------------|-------|------------------------|--------|------------------------------|------|----------------------------|------|------------------------|------|----------------------------|
| Amplitude<br>of seasonal<br>variations<br>[ mm ] | <b>63.1</b>  | 22.7  | <b>23.4</b>            | 56.6   | <b>62.9</b>                  | 44.2 | <b>45.2</b>                | 47.7 | <b>49.1</b>            | 39.7 | <b>40.8</b>                |
| Phase<br>(seasonal)<br>[ days ]                  | <b>Ref.</b>  | -36   | <b>-15</b>             | -16    | <b>-1.2</b>                  | -29  | <b>-17</b>                 | -26  | <b>-16</b>             | -29  | <b>-16</b>                 |
| Correlation                                      | <b>Ref.</b>  | 0.80  | <b>0.89</b>            | 0.93   | <b>0.95</b>                  | 0.88 | <b>0.93</b>                | 0.82 | <b>0.93</b>            | 0.86 | <b>0.92</b>                |
| RMS with<br>GRACE<br>[ mm ]                      | <b>Ref.</b>  | 47    | <b>38</b>              | 25     | <b>20</b>                    | 34   | <b>25</b>                  | 37   | <b>27</b>              | 36   | <b>28</b>                  |
| Trend<br>(2002/10 -<br>2009/09)<br>[ mm/yr ]     | <b>-11</b>   | - 3.2 | <b>-7.3</b>            | - 8.4  | <b>-12</b>                   | -6.0 | <b>-11</b>                 | -3.2 | <b>-7.3</b>            | -5.2 | <b>-9.2</b>                |
| Trend<br>(2006/10 –<br>2009/09)<br>[ mm/yr ]     | <b>-39</b>   | -7    | <b>-26</b>             | -21    | <b>-39</b>                   | -18  | <b>-37</b>                 | -7.9 | <b>-27</b>             | -14  | <b>-33</b>                 |

70

## 5. Lower Orinoco - Guri Dam

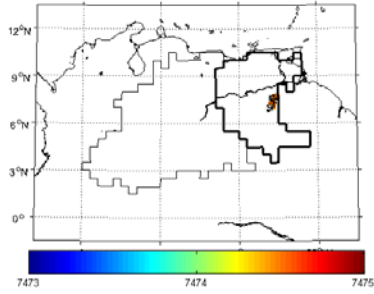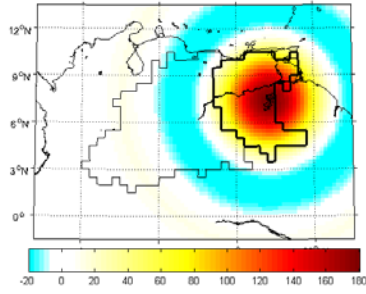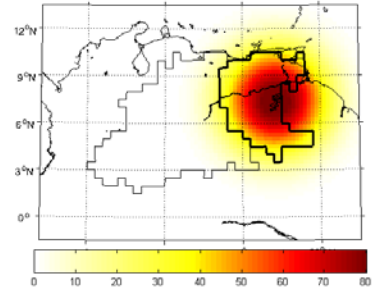

a) Orinoco basin (1 M km<sup>2</sup>)

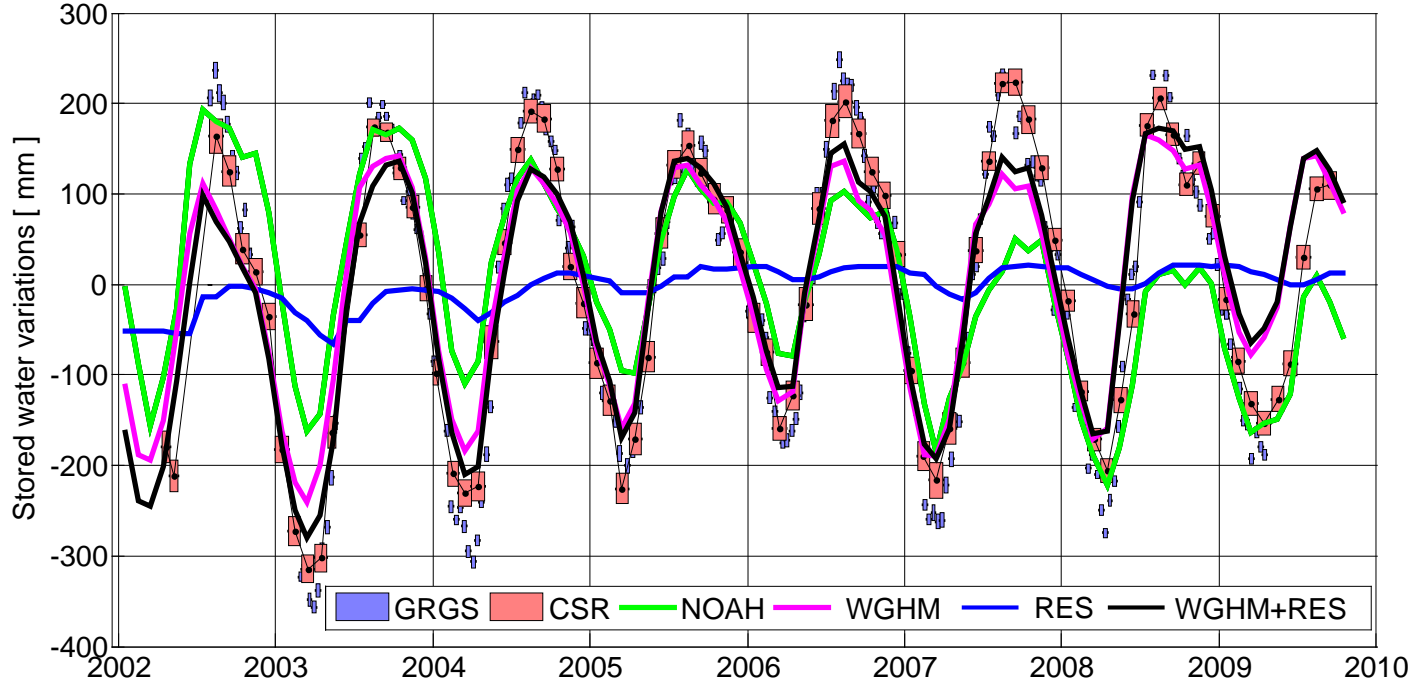

d) Lower Orinoco basin (350 000 km<sup>2</sup>)

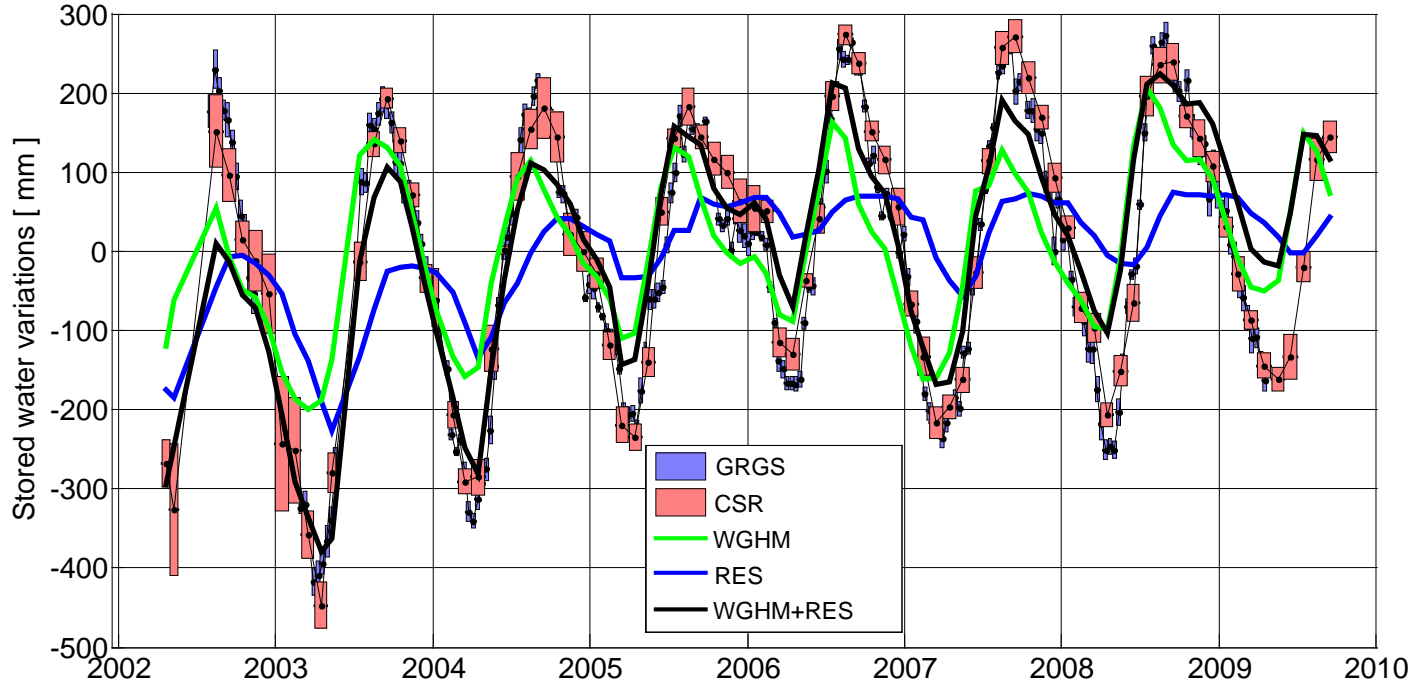



f) Lower Orinoco Basin (350 000 km<sup>2</sup>)

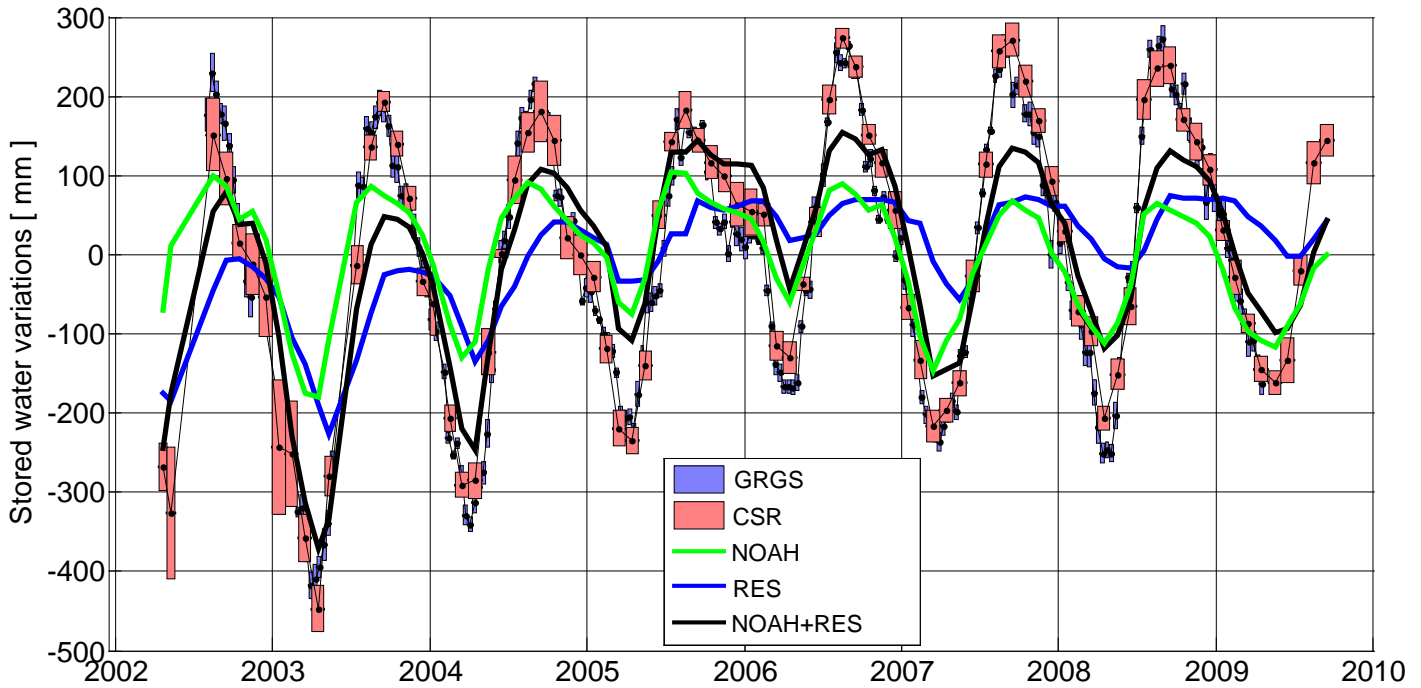

Figure S4: Lower Orinoco and Guri lake contribution. The Guri dam impounds the Caroni River (Venezuela) and creates a lake of 3919 km<sup>2</sup>. The first stage of the facility was completed in 1969 and completed in 1986, as a 162-m high earth and rockfill dam with a crest length of 11 km. It is mainly used for hydropower purposes (capacity of 10 300 MW) and supplies ~50% of Venezuela's electricity. In contrast to Lake Nasser, Guri lake is located in a tropical climate with large natural storage fluctuations.

- (a) Reservoir and standard deviation of Guri lake level variation within the basin,
- (b) same map after truncation at degree 50 similar to GRGS processing,
- (c) same map after truncation at degree 60 and 300-km Gaussian smoother applied, similar to CSR processing. The thick line represents the lower Orinoco basin, the thin line shows the Oricono basin;
- (d) GRACE Water storage variations in the Orinoco basin (1 M km<sup>2</sup>) compared to GLDAS, WGHM and RESS from Guri dam,
- (e) GRACE water storage variations in the Lower Orinoco basin (350 000 km<sup>2</sup>) compared to WGHM
- (f) same as e but comparison with NOAH SMS . Water storage variations from the inundated area along the course of the river are not modeled in GLDAS and may explain remaining discrepancy with GRACE.

The contribution of this single reservoir is significant, similar to the soil moisture contribution modeled by NOAH, and explains 25% (50 mm) of seasonal variations in the lower Orinoco basin (350 000 km<sup>2</sup>) and shifts the phase by 15 to 20 days (Table S2). This single lake explains nearly entirely the positive trend on the investigated period (20 mm/year; 7 km<sup>3</sup>/yr), while NOAH models a decreasing trend (Table S3). At the scale of the Orinoco basin as a whole (1 M km<sup>2</sup>), the Guri lake still contributes ~ 10% of the seasonal variations in water storage, and 65% of the trend at the scale of the basin

Table S3: Comparison between GRACE,  $\Delta$ SMS and  $\Delta$ RESS for the Lower Orinoco basin (350 000 km<sup>2</sup>)

|                               | GRACE<br>CSR | $\Delta$ RES<br>Contribution<br>to GRACE | NOAH | NOAH +<br>$\Delta$ RESS | WGHM | WGHM +<br>$\Delta$ RESS |
|-------------------------------|--------------|------------------------------------------|------|-------------------------|------|-------------------------|
| Seasonal amplitude [mm]       | <b>199</b>   | 51 (25%)                                 | 85   | <b>129</b>              | 116  | <b>143</b>              |
| Phase (seasonal) [ days ]     | <b>Ref.</b>  | +39                                      | -14  | <b>0</b>                | -28  | <b>-8</b>               |
| Correlation                   | <b>Ref.</b>  |                                          | 0.87 | <b>0.93</b>             | 0.84 | <b>0.91</b>             |
| Trend [ mm/yr ]               | <b>22</b>    | 20                                       | -4.6 | <b>16</b>               | 16   | <b>36</b>               |
| Trend [ km <sup>3</sup> /yr ] | <b>7.7</b>   | 7                                        | -1.6 | <b>5.6</b>              | 5.6  | <b>12.6</b>             |

Table S4: Comparison between GRACE,  $\Delta$ SMS and  $\Delta$ RESS for Orinoco basin (1 M km<sup>2</sup>)

|                               | GRACE<br>CSR | $\Delta$ RES<br>Contribution<br>to GRACE | NOAH | NOAH +<br>$\Delta$ RESS | WGHM | WGHM +<br>$\Delta$ RESS |
|-------------------------------|--------------|------------------------------------------|------|-------------------------|------|-------------------------|
| Seasonal amplitude [mm]       | <b>185</b>   | 16.5 (9%)                                | 113  | <b>127</b>              | 146  | <b>156</b>              |
| Phase (seasonal) [ days ]     | <b>Ref.</b>  | +44                                      | +7   | <b>+11</b>              | -10  | <b>-5</b>               |
| Correlation                   | <b>Ref.</b>  |                                          | 0.78 | <b>0.83</b>             | 0.93 | <b>0.95</b>             |
| Trend [ mm/yr ]               | <b>8.1</b>   | 5.3                                      | -23  | <b>-18</b>              | 10   | <b>16</b>               |
| Trend [ km <sup>3</sup> /yr ] | <b>8.1</b>   | 5.3                                      | -23  | <b>-18</b>              | 10   | <b>16</b>               |

# 1. East African Lakes

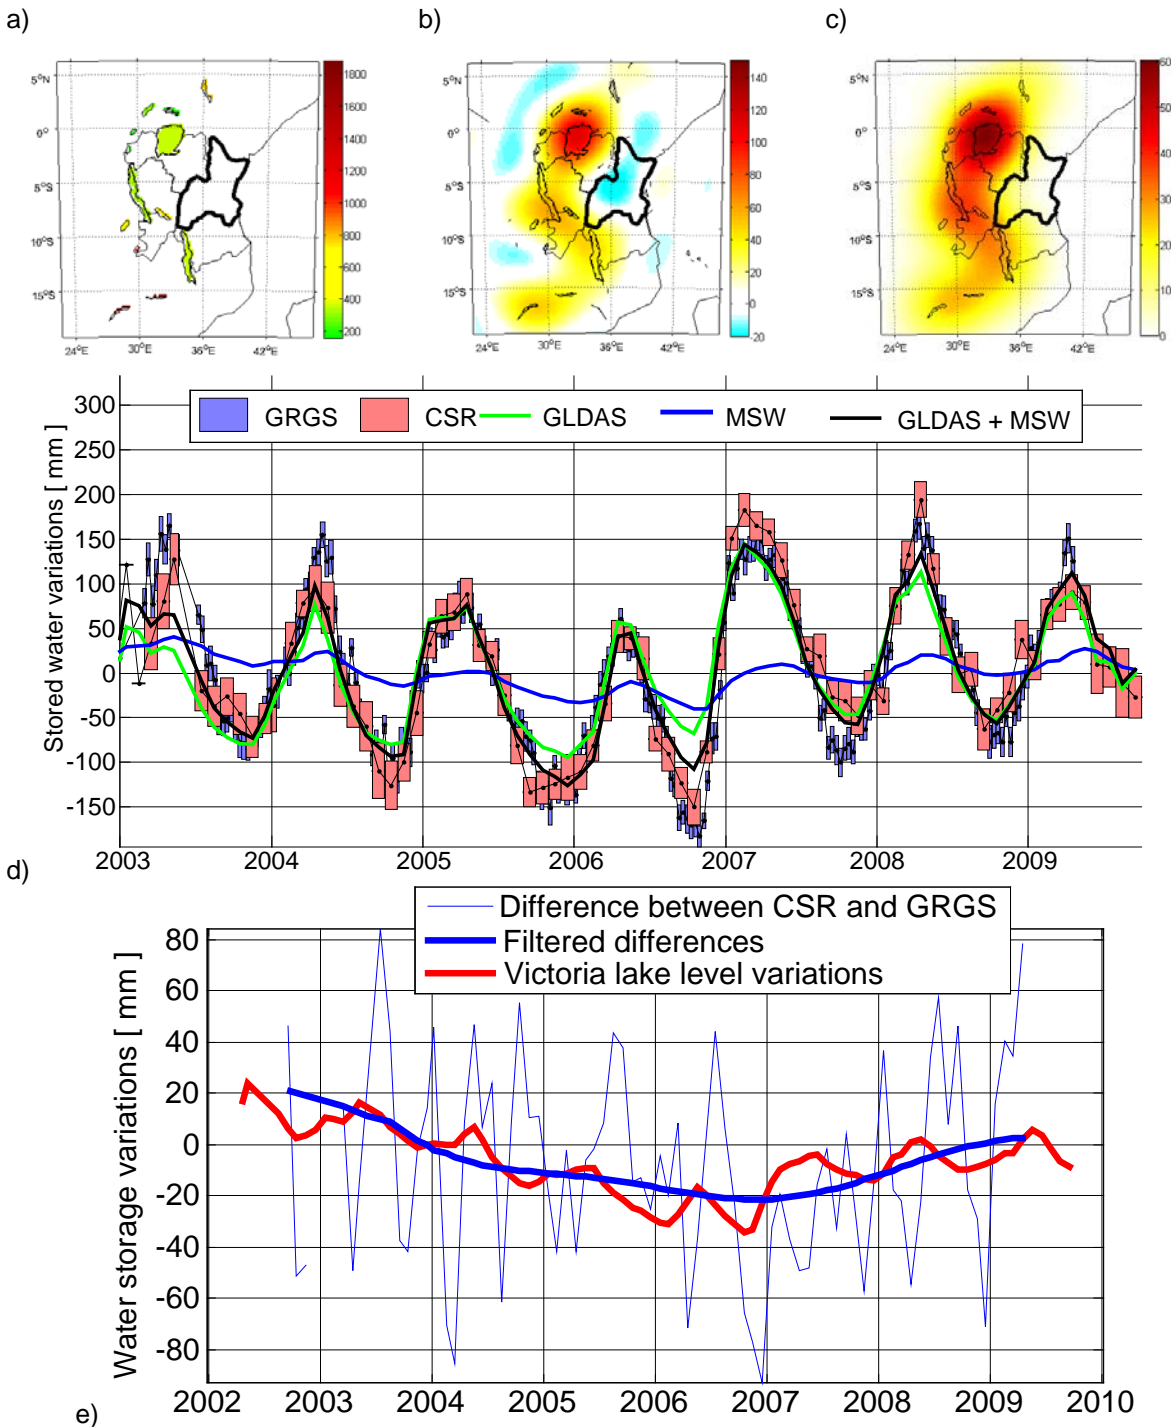

Figure S5: This example illustrate the East African lake contribution to GRACE from Xie et al., [2012].

- 110 (a) Reservoir distribution and mass variations for each of the 34 lakes, the thin outline shows Tanzania (1 125 000 km<sup>2</sup>), the thick outline shows the North Tanzanian Coastal Basin (355 000 km<sup>2</sup>). Note that most of the lakes are located at the edge or outside Tanzania. No lake is located within the North Tanzanian Coastal Basin
- 115 (b) Associated mass variations after truncation to degree 50, similar to GRGS processing,
- (c) Mass variations after truncation at degree 60 with 300-km Gaussian smoothing, similar to CSR processing. Note that the predicted lake effect on GRGS and CSR shows different leakage amplitudes and signs in the North Tanzanian Coastal Basin.

- 120 (d) Comparison between lake storage, GLDAS NOAH SMS, and GRACE over Tanzania as a whole. While most of the lakes are located at the edge or outside Tanzania, the inter-annual lake contribution is significant and reaches 80 mm (min-max) over this large basin.
- 125 e) Difference between CSR and GRGS solution over the North Tanzanian Coastal Basin. As predicted, the lake effect on CSR and GRGS has different leakage signs in this region, this should show up in the data. RMS difference between CSR and GRGS is ~39 mm. After filtering high-frequency noise, the long-term residuals show a clear correlation with Lake Victoria level variations ( $r=0.88$ ). While Lake Victoria is more than 300 km from the outline of the North Tanzanian Coastal basin, leakage from this lake is still important, and explains the differences between the two different GRACE processing strategies (CSR and GRGS).
